# Supplementary material for: Hippocampal subfield and amygdala nuclei volumes in schizophrenia patients with a history of violence
Source: PubMed Central journal article supplement (PMC7423802; doi:10.1007/s00406-020-01098-y), 2020-01-24
Supplement: 406_2020_1098_MOESM1_ESM.pdf [file 406_2020_1098_MOESM1_ESM.pdf]

**Supplementary Table 1** Results from regression analyses on hippocampal subfields and amygdala nuclei in patient groups.

**A**

| <b>SCZ-V vs SCZ-NV</b>            |                      |           |                |                    |
|-----------------------------------|----------------------|-----------|----------------|--------------------|
| <i>Region</i>                     | <i>B-coefficient</i> | <i>SE</i> | <i>p-value</i> | <i>Effect size</i> |
| whole hippocampus                 | -34.5                | 182.5     | 0.927          | -0.059             |
| parasubiculum                     | -7.6                 | 6.3       | 0.927          | -0.384             |
| presubiculum                      | -20.4                | 21.2      | 0.927          | -0.305             |
| subiculum                         | -44.2                | 73        | 0.927          | -0.191             |
| CA1                               | -6.7                 | 38.8      | 0.927          | -0.054             |
| CA3                               | 28.1                 | 15.3      | 0.927          | 0.581              |
| CA4                               | 13.7                 | 14.2      | 0.927          | 0.305              |
| GCMLDG                            | 13.3                 | 16.3      | 0.927          | 0.259              |
| HATA                              | -5.2                 | 4.9       | 0.927          | -0.338             |
| fimbria                           | -12.3                | 10.4      | 0.927          | -0.373             |
| molecular layer                   | 4.2                  | 29.3      | 0.927          | 0.0458             |
| hippocampal fissure               | 15                   | 13.8      | 0.927          | 0.345              |
| hippocampal tail                  | -53.5                | 52        | 0.927          | -0.326             |
| whole amygdala                    | 20                   | 93.7      | 0.927          | 0.067              |
| lateral nucleus                   | 8.3                  | 38.7      | 0.927          | 0.068              |
| basal nucleus                     | 5.9                  | 40.4      | 0.927          | 0.046              |
| accessory basal nucleus           | 2.3                  | 16.3      | 0.927          | 0.045              |
| anterior amygdaloid area          | 2.7                  | 4.7       | 0.927          | 0.184              |
| central nucleus                   | 1.3                  | 4         | 0.927          | 0.107              |
| medial nucleus                    | 2.5                  | 2.8       | 0.927          | 0.278              |
| cortical nucleus                  | 1.4                  | 2         | 0.927          | 0.217              |
| corticoamygdaloid transition area | -2.2                 | 10.6      | 0.927          | -0.067             |
| paralamina nucleus                | 0.1                  | 2.8       | 0.979          | 0.008              |

**B**

| <b>SCZ-V vs SCZ-NV</b> |                      |           |                |                    |
|------------------------|----------------------|-----------|----------------|--------------------|
| <i>Region</i>          | <i>B-coefficient</i> | <i>SE</i> | <i>p-value</i> | <i>Effect size</i> |
| whole hippocampus      | -59.8                | 178.7     | 0.904          | -0.105             |
| parasubiculum          | -5.6                 | 6.1       | 0.75           | -0.293             |
| presubiculum           | -27.4                | 20.8      | 0.75           | -0.415             |

|                                   |       |      |        |        |
|-----------------------------------|-------|------|--------|--------|
| subiculum                         | -75.3 | 71.4 | 0.75   | -0.333 |
| CA1                               | -16.9 | 39.3 | 0.9045 | -0.136 |
| CA3                               | 28.5  | 15.8 | 0.582  | 0.569  |
| CA4                               | 15.8  | 14.1 | 0.75   | 0.353  |
| GCMLDG                            | 15.1  | 16.4 | 0.75   | 0.292  |
| HATA                              | -9    | 4.8  | 0.582  | -0.590 |
| fimbria                           | -14.8 | 10.3 | 0.75   | -0.455 |
| molecular layer                   | -6.4  | 28.9 | 0.904  | -0.069 |
| hippocampal fissure               | 29.8  | 14.1 | 0.582  | 0.667  |
| hippocampal tail                  | -29.7 | 49.9 | 0.904  | -0.188 |
| whole amygdala                    | -13.3 | 95.1 | 0.929  | -0.044 |
| lateral nucleus                   | 1.6   | 37.9 | 0.966  | 0.013  |
| basal nucleus                     | -13   | 42.3 | 0.904  | -0.097 |
| accessory basal nucleus           | -4    | 16.9 | 0.904  | -0.075 |
| anterior amygdaloid area          | 1.4   | 4.6  | 0.904  | 0.097  |
| central nucleus                   | 0.9   | 3.9  | 0.904  | 0.074  |
| medial nucleus                    | 3.7   | 2.8  | 0.75   | 0.412  |
| cortical nucleus                  | 2.2   | 1.9  | 0.75   | 0.359  |
| corticoamygdaloid transition area | -8.7  | 10.5 | 0.787  | -0.261 |
| paralaminar nucleus               | -1.4  | 2.7  | 0.904  | -0.165 |

## C

### SCZ-V vs SCZ-NV

| <i>Region</i>     | <i>B-coefficient</i> | <i>SE</i> | <i>p-value</i> | <i>Effect size</i> |
|-------------------|----------------------|-----------|----------------|--------------------|
| whole hippocampus | -159.2               | 188.2     | 0.768          | -0.269             |
| parasubiculum     | -8.7                 | 6.1       | 0.601          | -0.456             |
| presubiculum      | -44.8                | 21.4      | 0.601          | -0.668             |
| subiculum         | -129.7               | 73.9      | 0.601          | -0.559             |
| CA1               | -29.4                | 40.5      | 0.782          | -0.231             |
| CA3               | 27.4                 | 15.6      | 0.601          | 0.560              |
| CA4               | 5.4                  | 14.5      | 0.909          | 0.119              |
| GCMLDG            | 6.4                  | 16.5      | 0.909          | 0.124              |
| HATA              | -4.7                 | 4.8       | 0.768          | -0.307             |

|                                   |       |      |       |        |
|-----------------------------------|-------|------|-------|--------|
| fimbria                           | -16.2 | 10.5 | 0.601 | -0.491 |
| molecular layer                   | -21.7 | 30.3 | 0.782 | -0.228 |
| hippocampal fissure               | 16.3  | 14.5 | 0.768 | 0.357  |
| hippocampal tail                  | -50.3 | 51.2 | 0.768 | -0.313 |
| whole amygdala                    | -18.8 | 94.9 | 0.946 | -0.063 |
| lateral nucleus                   | -12.3 | 38.8 | 0.909 | -0.101 |
| basal nucleus                     | -13.2 | 41   | 0.909 | -0.102 |
| accessory basal nucleus           | -2    | 16.7 | 0.947 | -0.037 |
| anterior amygdaloid area          | -0.1  | 4.6  | 0.982 | -0.007 |
| central nucleus                   | 3.4   | 4    | 0.768 | 0.271  |
| medial nucleus                    | 4.4   | 3    | 0.601 | 0.461  |
| cortical nucleus                  | 2.1   | 2    | 0.768 | 0.333  |
| corticoamygdaloid transition area | -1.8  | 10.6 | 0.946 | -0.054 |
| paralamina nucleus                | -1.2  | 2.8  | 0.909 | -0.134 |

**a** Regression analysis on hippocampal subfields and amygdala nuclei between SCZ-V and SCZ-NV covaried for antipsychotic medication use **b** Regression analysis on hippocampal subfields and amygdala nuclei between SCZ-V and SCZ-NV covaried for duration of illness **c** Regression analysis on hippocampal subfields and amygdala nuclei between SCZ-V and SCZ-NV covaried for illicit substance use

Abbreviations: SCZ-V schizophrenia patients with a history of violence, SCZ-NV schizophrenia patients with no history of violence, HC healthy controls, CA cornu ammonis, GCMLDG granule cell layer of dentate gyrus, HATA hippocampal-amygdaloid transition area

All analyses were covaried for age, age<sup>2</sup>, sex, intracranial volume (ICV) and scanning site. All p-values are FDR-corrected for multiple comparisons.

Hippocampal subfield and amygdala nuclei volumes in schizophrenia patients with a history of violence; European Archives of Psychiatry and Clinical Neuroscience; Natalia Tesli, Dennis van der Meer, Jaroslav Rokicki, Guttorm Storvestre, Cato Røsæg, Arvid Jensen, Gabriela Hjell, Christina Bell, Thomas Fischer-Vieler, Martin Tesli, Ole A Andreassen, Ingrid Melle, Ingrid Agartz, Unn K Haukvik\*

\*Corresponding author: Haukvik UK, MD, Ph.D, email: u.k.h.haukvik@medisin.uio.no, postal address: Oslo University Hospital, P.O.Box 4956 Nydalen, 0424 Oslo, Norway, phone: +47 23 02 73 50
